# Supplementary material
Source: PubMed Central journal article supplement (PMC394242)
Supplement: 7600188s1.pdf [file 7600188s1.pdf]

**A**

|              |   |   |   |   |
|--------------|---|---|---|---|
| control RNAi | + | - | - | - |
| Bcl-2 RNAi   | - | + | + | - |
| Bcl-xl RNAi  | - | - | + | + |

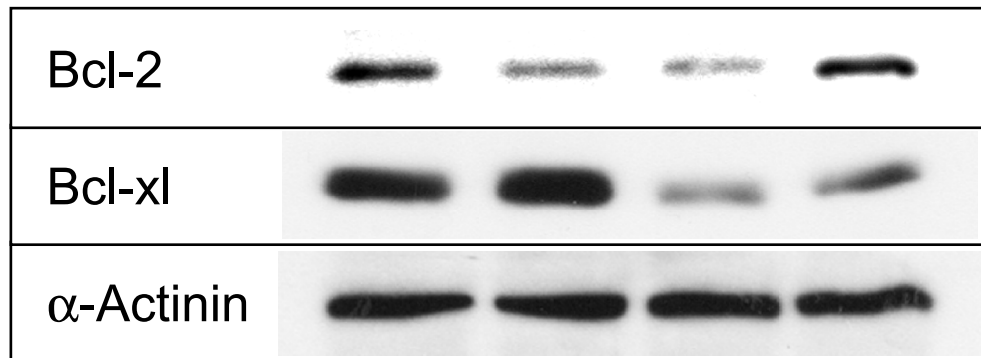**B**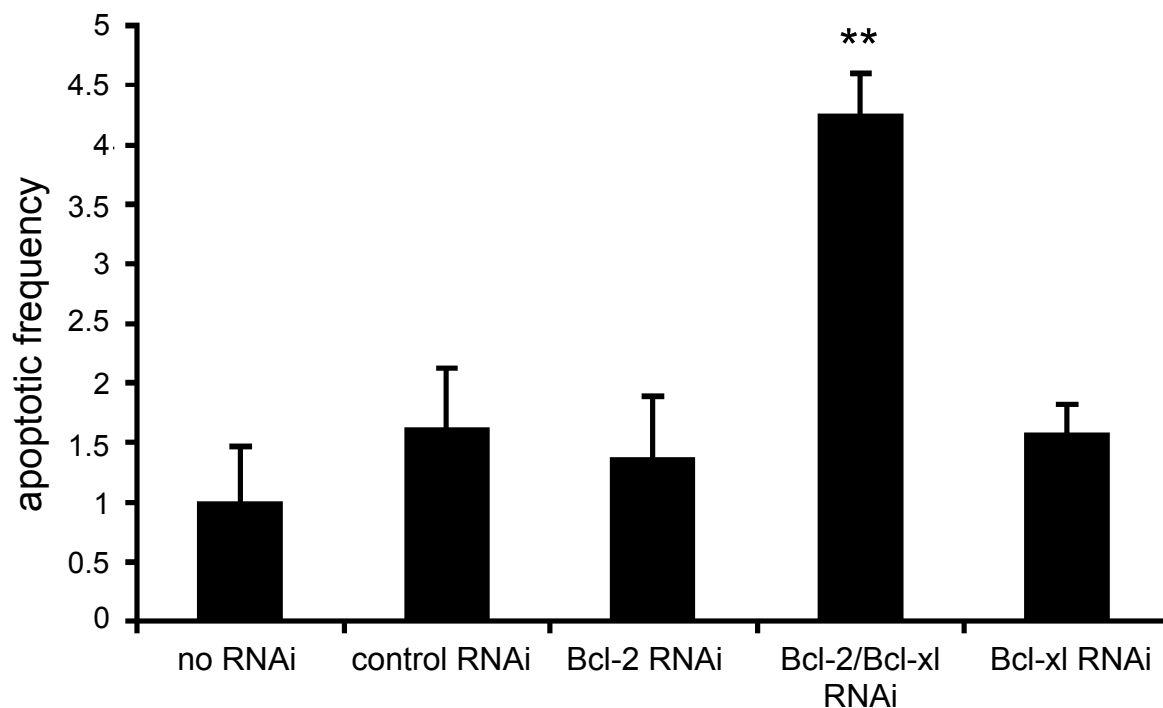

**Suppl. Fig. S1: Simultaneous RNAi-mediated knockdown of Bcl-2/Bcl-xl expression increases apoptosis in differentiating ES cells.** (A) Wild-type ES cells were transiently transfected with RNAi directed against GluR2 (control), Bcl-2, Bcl-xl or Bcl-2/Bcl-xl, followed by in vitro differentiation for four days. Protein extracts were prepared and subjected to Western blotting with anti-Bcl-2, anti-Bcl-xl and anti- $\alpha$ -actinin antibodies. (B) Apoptosis in wild-type ES cells treated as in (A) was determined by TUNEL staining. Apoptotic frequency in control-transfected cells (no RNAi) was arbitrarily set to one. Results represent the mean of three independent experiments  $\pm$  SD (\*\*  $p < 0.005$ , Student's t-test).
